# Supplementary material for: Ectopic Expression of a Maize Gene ZmDUF1645 in Rice Increases Grain Length and Yield, but Reduces Drought Stress Tolerance
Source: MDPI journal article supplement (doi:10.3390/ijms24129794), 2023-06-06
Supplement: s1 [file s1]

**Table S1.** PCR Primers.

| Primer Name | Primer Sequences                                                      |
|-------------|-----------------------------------------------------------------------|
| ZmDUF1645   | F:5'-ATGCGGGCACGAAGAATAAG-3'<br>R:5'-TTGCCGTAGAAGAGCCTGTG-3'          |
| GW2         | F:5'-CTGCAGCAGGGAAGTGTT-3'<br>R:5'-ATGTCTGAGCCCGCGTAG-3'              |
| GS3         | F:5'-CATCGGAGAAGCGAAGTCA-3'<br>R:5'-CAGCAGCAGATCCAGGAGA-3'            |
| GIF1        | F:5'-CATCGCGCAACCCGAACATG-3'<br>R:5'-TGTCGATCAGGCTCCTCAGAG-3'         |
| GS5         | F:5'-AGTGGACTGCTTCCAGGGAAG-3'<br>R:5'-CACGCAGTACCGAGAACTGA-3'         |
| RR1         | F:5'-AGGATCAGCAGATGCATGAATG-3'<br>R:5'-GAGACGCTGTACGTCCTTGCTT-3'      |
| RR4         | F:5'-TCTTCTGAGAATGTGCCTGCAA-3'<br>R:5'-GCTTGACAGGTTTCAGGAAGAACT-3'    |
| RR9         | F:5'-TCATGAGGACAGCCCAATTTCTA-3'<br>R:5'-TGCAGTAGTCTGTGATGATCAGGTT-3'  |
| MAPK6       | F:5'-ACAGAGCAGCCGAATTTTGAGA-3'<br>R:5'-TTCAGCGAAGCTCACACTTGG-3'       |
| IPT9        | F:5'-GCTCTTGTTAGCCCATTCCTCTT-3'<br>R:5'-TGGTTGTTTCGGGTGTATCCTTT-3'    |
| LOG         | F:5'-AGCGAAGGATTCATAGCGGA-3'<br>R:5'-CGGCATCTGATCGTCCCAA-3'           |
| CDKA1       | F:5'-GGTTTGGACCTTCTCTCTAAAATGC-3'<br>R:5'-AGAGCCTGTCTAGCTGTGATCCTT-3' |
| CDKA2       | F:5'-GGTTTGGACCTTCTCTCTAAAATGC-3'<br>R:5'-AGAGCCTGTCTAGCTGTGATCCTT-3' |
| CAK1A       | F:5'-GGTTTGGACCTTCTCTCTAAAATGC-3'<br>R:5'-AGAGCCTGTCTAGCTGTGATCCTT-3' |
| P5CS1       | F:5'-GCTGACATGGATATGGCAAAAC-3'<br>R:5'-GTAAGGTCTCCATTGCATTGCA-3'      |
